# Supplementary material for: Pressure-driven supercritical CO2transport through a silica nanochannel
Source: Royal Society of Chemistry journal article supplement (doi:10.1039/c7ra11746a), 2018-01-01
Supplement: c7ra11746a1.pdf [file c7ra11746a1.pdf]

## Supporting Information

### Pressure-driven Supercritical CO<sub>2</sub> Transport through a Silica Nanochannel

Bing Liu <sup>a,\*</sup>, Xiaoqi Li <sup>a</sup>, Chao Qi <sup>a</sup>, Tingyi Mai <sup>a</sup>, Kaiyun Zhan <sup>a,\*</sup>, Li Zhao <sup>a</sup>, Yue Shen <sup>a</sup>

<sup>a</sup> School of Science, China University of Petroleum, Qingdao 266580, Shandong, China

#### 1. Potential model

This section provides details of the potential models used in the molecular dynamics simulation. The CO<sub>2</sub> molecule consists of three sites, one carbon (ct) and two oxygens (o'). The cristobalite was employed to construct nanochannel with the hydroxylated surface. There are four atom types in silica: atom Si (sz) and O (oz) of SiO<sub>2</sub>, atom H (ho) and O (oh) of hydroxyl. The nanochannel was set to rigid and was fixed in all simulations. Angle was modeled by a harmonic potential of the form:

$$U = \frac{1}{2} \kappa_r (\theta - \theta_0)^2 \quad (1-1)$$

Bond was modeled by a harmonic potential of the form:

$$U = \frac{1}{2} \kappa_\theta (r - r_0)^2 \quad (1-2)$$

The intermolecular potential is the sum of a Lennard-Jones (L-J) term and a Coulomb term:

$$U_{ij} = 4\varepsilon_{ij} \left[ \left( \frac{\sigma_{ij}}{r_{ij}} \right)^{12} - \left( \frac{\sigma_{ij}}{r_{ij}} \right)^6 \right] + k \frac{q_i q_j}{r_{ij}} \quad (1-3)$$

The following Tables present the intra- and inter-molecular potential parameters used in the simulations.

Table S1: Lennard-Jones parameters, point charges and atomic masses.

| Type | $\sigma$ (Å) | $\varepsilon$ (kcal/mol) | q (e)   | Mass (g/mol) |
|------|--------------|--------------------------|---------|--------------|
| o'   | 3.03300      | 0.1598518052             | -0.4238 | 15.999400    |
| ct   | 2.75700      | 0.0558519312             | 0.8476  | 12.011150    |
| sz   | 3.30203      | 0.0000018405             | 2.1000  | 28.086000    |
| oz   | 3.16556      | 0.1554000000             | -1.0500 | 15.999400    |
| oh   | 3.16556      | 0.1554000000             | -0.9500 | 15.999400    |
| ho   | 0.00000      | 0.0000000000             | 0.4250  | 1.007970     |

Table S2: Bonds lengths and harmonic force constants.

| Bond  | $\kappa_r$ (kcal/(mol·Å <sup>2</sup> )) | $r_0$ (Å) |
|-------|-----------------------------------------|-----------|
| ct-o' | 295.4111                                | 1.1490    |
| sz-oz | 600.0000                                | 1.6150    |
| sz-oh | 600.0000                                | 1.6350    |
| oh-ho | 600.0000                                | 1.0000    |

Table S3: Angles and harmonic force constants.

| Angle    | $\kappa_\theta$ (kcal/(mol·rad <sup>2</sup> )) | $\theta_0$ (deg) |
|----------|------------------------------------------------|------------------|
| o'-ct-o' | 295.4111                                       | 180.0000         |
| oz-sz-oz | 600.0000                                       | 109.4700         |
| sz-oz-sz | 600.0000                                       | 155.0000         |
| oz-sz-oh | 600.0000                                       | 109.4700         |
| oh-sz-oh | 600.0000                                       | 109.4700         |
| sz-oh-ho | 600.0000                                       | 109.4700         |

## 2. Adsorption of scCO<sub>2</sub>

To understand the adsorption of CO<sub>2</sub> in nanochannel under 373.15k and 35MPa, the density profiles and isothermal adsorption curve were calculated with equilibrium dynamics simulation (EMD). Two procedures were carried out. Firstly, CO<sub>2</sub> molecules with the density matched with the given temperature and pressure were

placed in nanochannel. The pressure of bulk phase was examined and set to the final pressure of the whole system after 2ns EMD simulation. Then, the total adsorption and excess adsorption was calculated. The results were plotted in Figure S1.

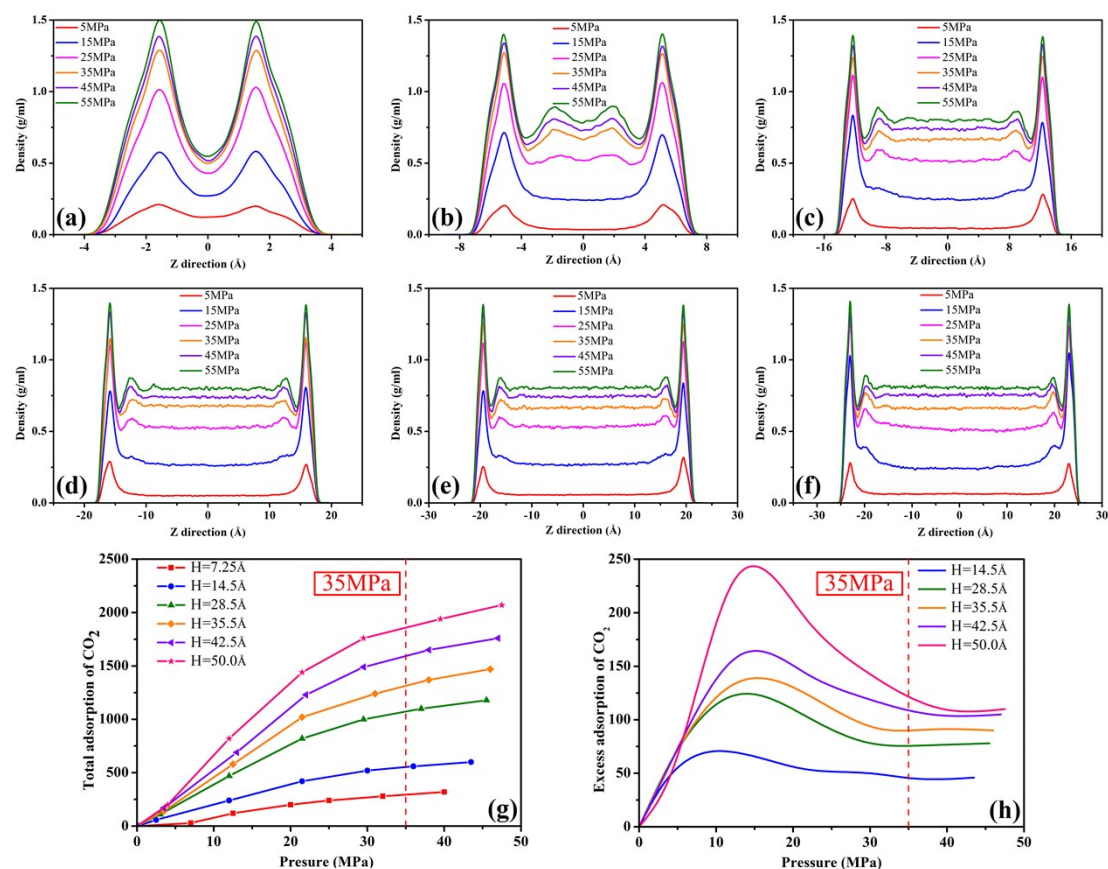

Fig S1. Density profiles of CO<sub>2</sub> in the nanochannel with different width under different pressure: (a) 7.25 Å, (b) 14.5 Å, (c) 28.5 Å, (d) 35.5 Å, (e) 42.5 Å, and (f) 50.0 Å. The dependence of adsorption on pressure: (g) total adsorption, and (h) excess adsorption.

Figure S1a shows the density profiles of CO<sub>2</sub> inside the nanochannel with width of 7.25 Å under different pressures. It indicates one adsorbed layer occurring near each surface in the nanochannel. The increment of adsorbed molecules decayed with the increase of pressure. The similar tendency was observed in wider nanochannels. In Figure S1b, the second adsorbed layer appeared gradually with the raise of pressure in the nanochannel of 14.5 Å. The phenomenon was also observed in wider

nanochannels. Figure S1c, S1d, S1e and S1f describe the density distributions of CO<sub>2</sub> molecules within nanochannels larger than 14.5 Å. The results show that the second adsorbed layer appears preliminary at 15 MPa and enhances gradually with the increase of pressure.

Figure S1g and Figure S1h present the total adsorption and the excess adsorption of CO<sub>2</sub>, respectively. It is observed that CO<sub>2</sub> molecules reach the saturated adsorption inside the nanochannels at 373.15 K and 35 MPa. This underlies the further study of CO<sub>2</sub> transport through nanochannels.

### 3. Fitting parameters of velocity profiles

The velocity profiles were obtained by fitting data using the quadratic function:

$$v(z) = az^2 + bz + c \quad (-14.25 \leq z \leq 14.25) \quad (s1)$$

where *a*, *b*, and *c* are the fitting parameters describing the flow process, *a* characterizes the curvature. The larger the absolute value of *a* is, the steeper the curve and the greater the velocity gradient. *c* represents the maximum velocity. The value of fitting parameters influenced by pressure gradient were shown in Table S4, and the value of fitting parameters influenced by nanochannel width were shown in Table S5.

Table S4: Values of fitting parameters influenced by pressure gradient

| acceleration<br>(kcal/(mol·Å)) | <i>a</i> | <i>b</i> | <i>c</i>  |
|--------------------------------|----------|----------|-----------|
| 0.002                          | -0.17459 | -0.47367 | 32.97418  |
| 0.006                          | -0.41995 | 0.79587  | 96.89612  |
| 0.01                           | -0.72687 | 0.12186  | 156.63557 |
| 0.03                           | -2.55533 | 0.23876  | 568.79184 |
| 0.05                           | -5.40817 | 0.81481  | 1103.8837 |

Table S5: Values of fitting parameters influenced by nanochannel width

| width of nanochannel (Å) | <i>a</i> | <i>b</i> | <i>c</i>  |
|--------------------------|----------|----------|-----------|
| 7.25                     | -0.48899 | -0.85337 | 10.71326  |
| 14.5                     | -0.59683 | 0.72443  | 27.82092  |
| 28.5                     | -0.65869 | 0.64921  | 134.55876 |
| 35.5                     | -0.75796 | -0.44694 | 234.7946  |
| 42.5                     | -0.78029 | 0.29889  | 344.04174 |
| 50.0                     | -0.88666 | 0.06912  | 539.76988 |
